# Supplementary material for: Marine Sponge-Derived Streptomyces sp. SBT343 Extract Inhibits Staphylococcal Biofilm Formation
Source: PubMed Central journal article supplement (PMC5311426; doi:10.3389/fmicb.2017.00236), 2017-02-16
Supplement: Image_1.pdf [file Image_1.pdf]

## Supplementary Material

### Marine sponge-derived *Streptomyces* sp. SBT343 extract inhibits staphylococcal biofilm formation

Srikanth Balasubramanian, Eman Maher Othman, Daniel Kampik, Helga Stopper, Ute Hentschel, Wilma Ziebuhr, Tobias A. Oelschlaeger\* and Usama Ramadan Abdelmohsen\*

\* **Correspondence:** Corresponding Author: [usama.ramadan@uni-wuerzburg.de](mailto:usama.ramadan@uni-wuerzburg.de) (UA)  
[t.oelschlaeger@uni-wuerzburg.de](mailto:t.oelschlaeger@uni-wuerzburg.de) (TÖ)

#### Supplementary Figure

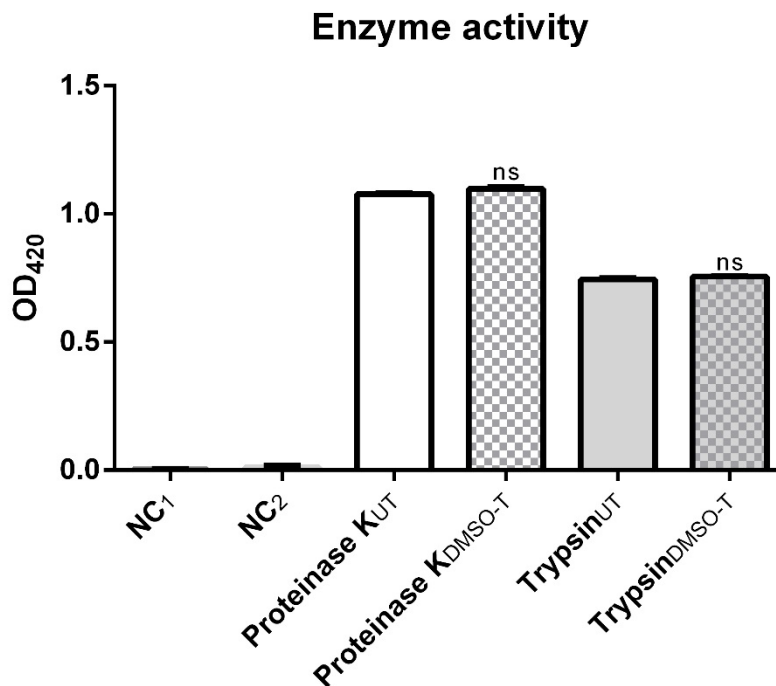

**Supplementary Figure 1.** Enzyme activity as determined by azocasein assay. OD<sub>420</sub> values are directly proportional to the enzyme activities. NC1, negative control 1 (100 mM Tris pH 7.5); NC2, negative control 2 (100 mM Tris pH 7.5 + DMSO); UT, untreated; DMSO-T, DMSO treated. Each data point is composed of three independent experiments and standard errors are reported.
